# Supplementary material for: Evaluation of chemical properties of cold pressed onion, okra, rosehip, safflower and carrot seed oils: triglyceride, fatty acid and tocol compositions
Source: Royal Society of Chemistry journal article supplement (doi:10.1039/c6ay00709k), 2016-01-01
Supplement: c6ay00709k1.pdf [file c6ay00709k1.pdf]

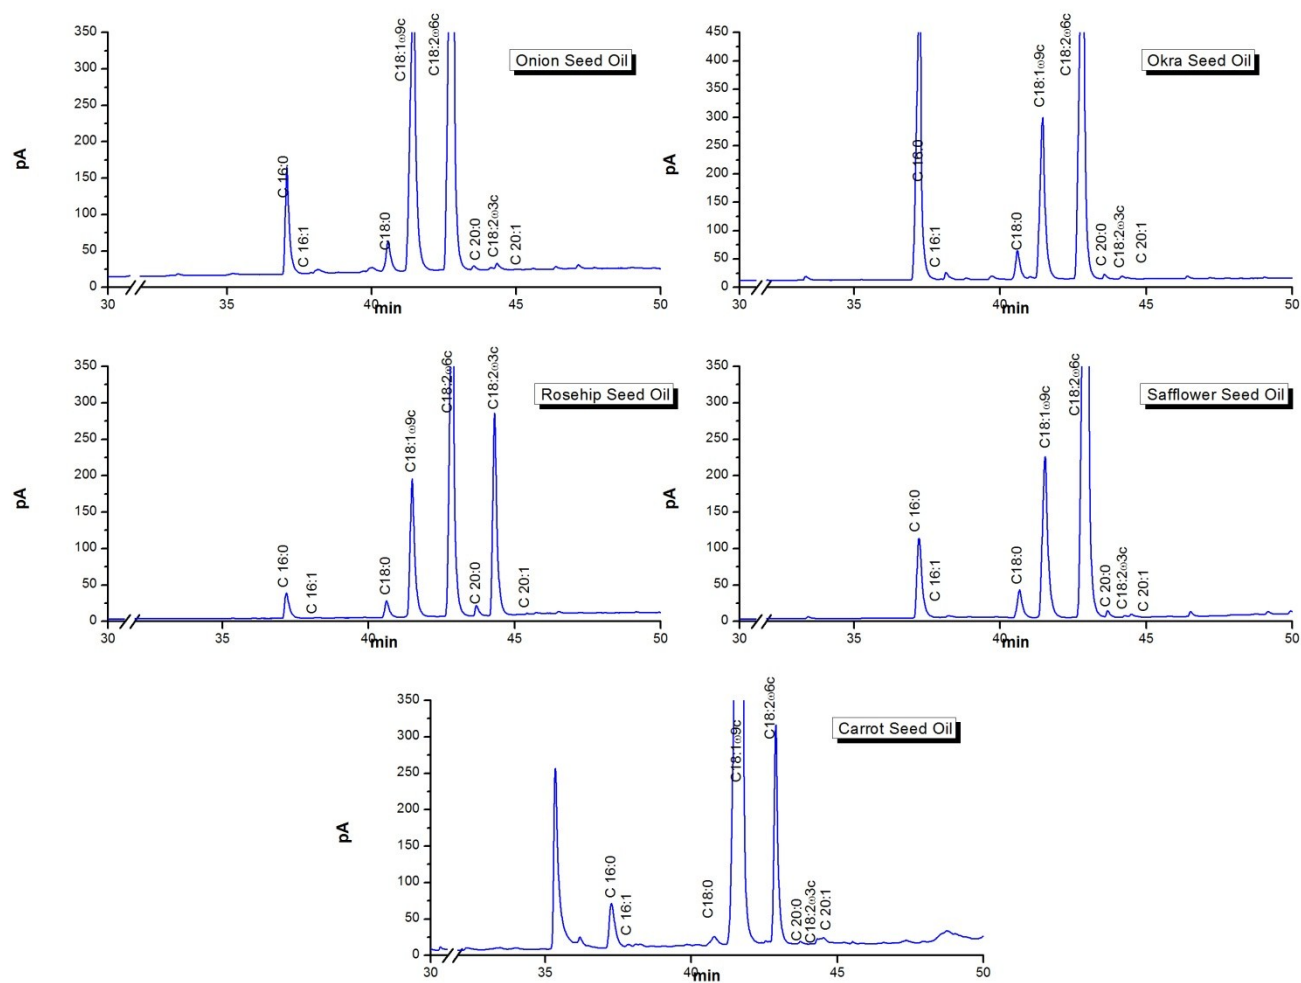

**Fig. S1.** The fatty acid (FA) composition chromatograms for onion, okra, rosehip, safflower and carrot seed oils

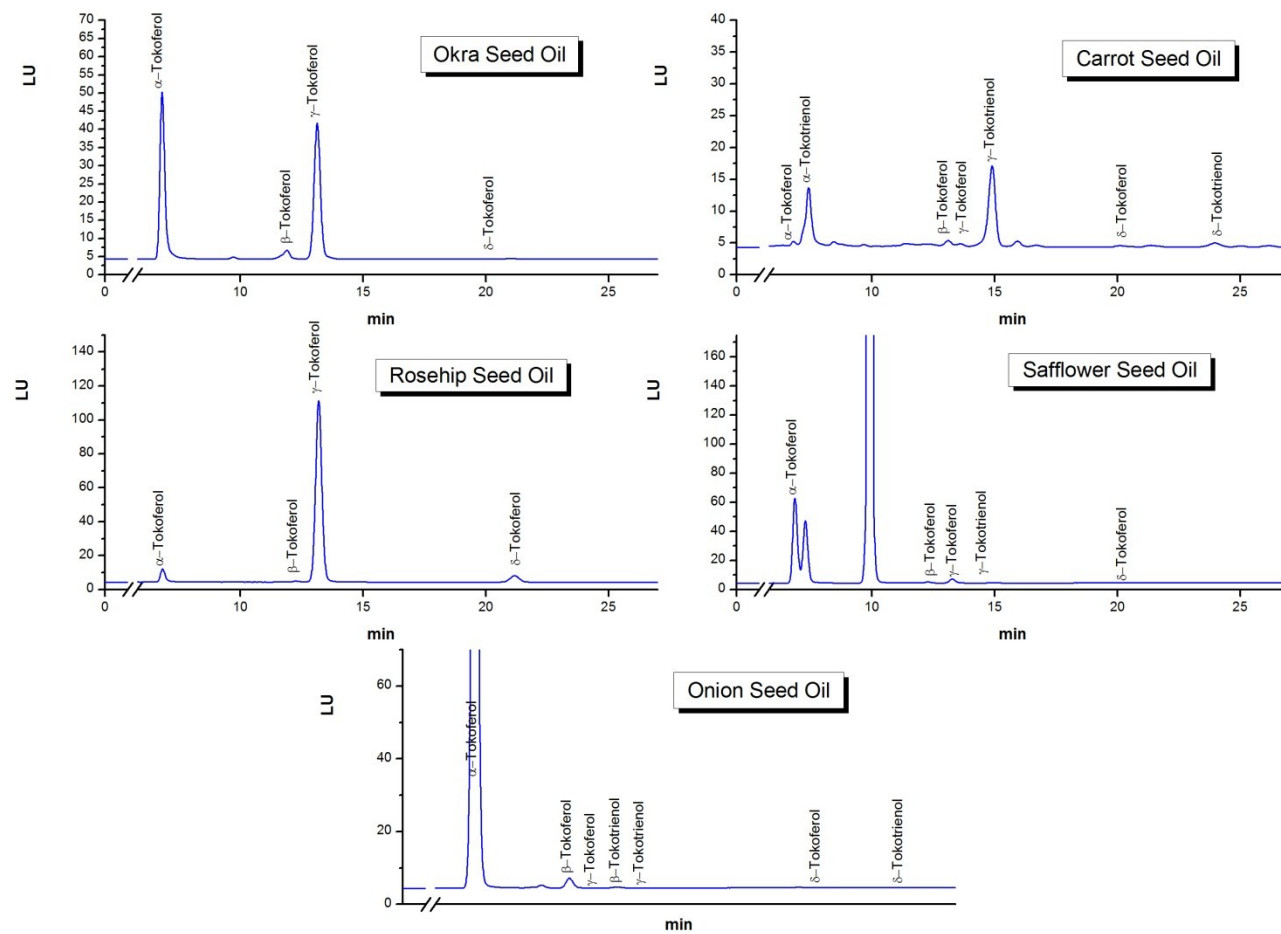

**Fig. S2.** The tocol chromatograms for onion, okra, rosehip, safflower and carrot seed oils
